# Supplementary material for: Lipopolysaccharide-Induced Acute Kidney Injury Is Dependent on an IL-18 Receptor Signaling Pathway
Source: MDPI journal article supplement (doi:10.3390/ijms18122777), 2017-12-20
Supplement: s1 [file s1]

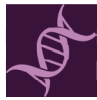

Article

# Lipopolysaccharide-Induced Acute Kidney Injury Is Dependent on an IL-18 Receptor Signaling Pathway

**Supplementary Table 1.** Clinical parameters of experimental mice.

|                       | 18 h                                  | 120 h                                 |
|-----------------------|---------------------------------------|---------------------------------------|
|                       | WT vs. IL-18R $\alpha$ KO             | WT vs. IL-18R $\alpha$ KO             |
| MAP (mmHg)            | 88.8 $\pm$ 12.1 vs. 92.9 $\pm$ 18.2   | 93.2 $\pm$ 42.1 vs. 82.3 $\pm$ 16.8   |
| HR (beats per minute) | 400.4 $\pm$ 23.7 vs. 440.8 $\pm$ 31.2 | 386.2 $\pm$ 18.3 vs. 412.7 $\pm$ 29.6 |

We measured the blood pressure values of mice by a tail cuff at 18 and 120 h (each group;  $n = 4$ ). The data are the mean  $\pm$  SEM. Abbreviation; MAP, mean arterial pressure; HR, heart rate.

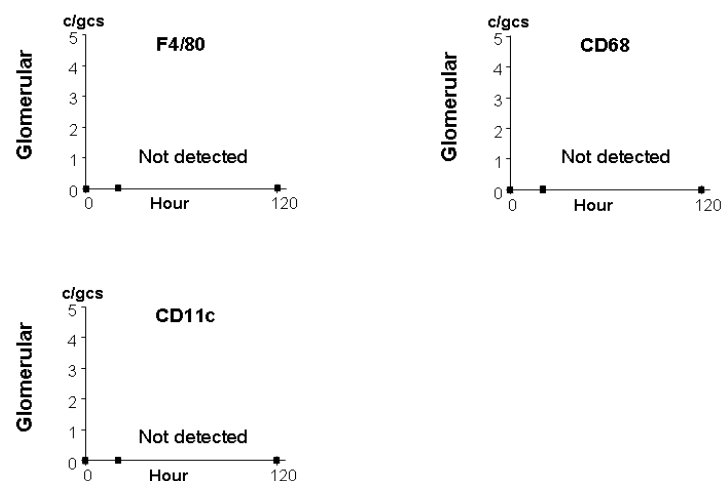

**Supplementary Figure 1.** Effect of IL-18R $\alpha$  on the accumulation of inflammation cells in the glomerulus after LPS injection. The accumulation of F4/80 $^{+}$ , CD68 $^{+}$  and CD11c $^{+}$  cells in the glomerulus at 0 (KO and WT,  $n = 3$ ), 18 ( $n = 11$  and  $n = 10$ ) and 120 h ( $n = 16$  and  $n = 6$ ) before and after LPS injection.

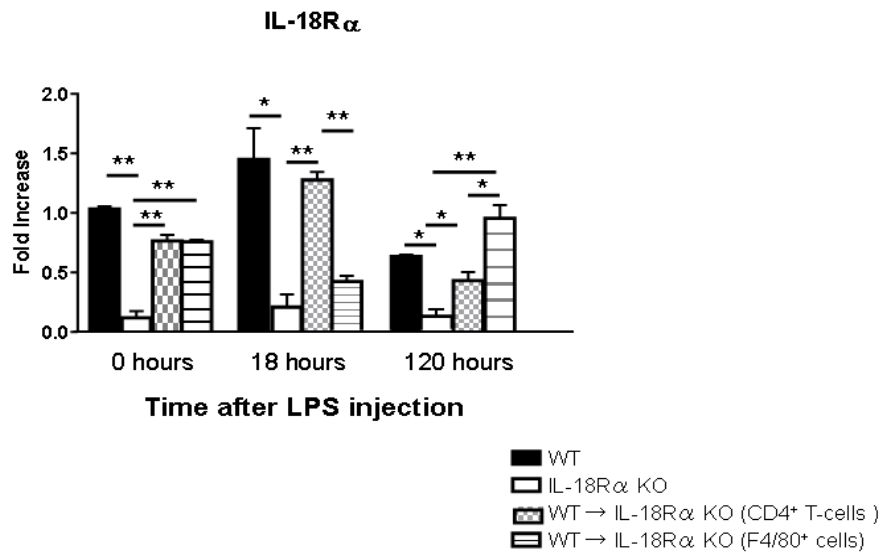

**Supplementary Figure 2.** Effect of splenocyte transfer on mRNA expression of IL-18R $\alpha$ . Mice were sacrificed at 0, 18 and 120 h after LPS injection (each group;  $n = 6$ ). Gene expressions of IL-18R $\alpha$  were measured by real-time PCR. In each experiment, the expression levels were normalized to the expression of 18S rRNA and were expressed relative to the values of saline-treated control mice. The data are the mean fold-increase  $\pm$  SEM: \*  $p < 0.05$ , \*\*  $p < 0.01$ .
